# Supplementary material for: The interface microstructure and band alignment of hexagonal boron nitride/diamond heterojunctions
Source: Royal Society of Chemistry journal article supplement (doi:10.1039/d3tc00498h), 2023-01-01
Supplement: d3tc00498h1.pdf [file d3tc00498h1.pdf]

## Electronic supplementary information

# Interface microstructure and band alignment of hexagonal boron nitride/diamond heterojunction

Jingren Chen,<sup>ab</sup> Ran Tao,<sup>c</sup> Gaokai Wang,<sup>ab</sup> Zhigang Yin,<sup>ab</sup> Libin Zeng,<sup>ab</sup> Xinxin Yu,<sup>c</sup> Siyu Zhang,<sup>ab</sup>  
Yun Wu,<sup>\*c</sup> Zhonghui Li,<sup>c</sup> Xingwang Zhang<sup>\*ab</sup>

<sup>a</sup> Key Lab of Semiconductor Materials Science, Institute of Semiconductors, Chinese Academy of Sciences, Beijing 100083, P. R. China

<sup>b</sup> Center of Materials Science and Optoelectronics Engineering, University of Chinese Academy of Sciences, Beijing 100049, P. R. China

<sup>c</sup> CETC Key Laboratory of Carbon-based Electronics, Nanjing Electronic Devices Institute, Nanjing 210016, P. R. China

\* Corresponding author. E-mail: [wuyun012@126.com](mailto:wuyun012@126.com), [xwzhang@semi.ac.cn](mailto:xwzhang@semi.ac.cn)

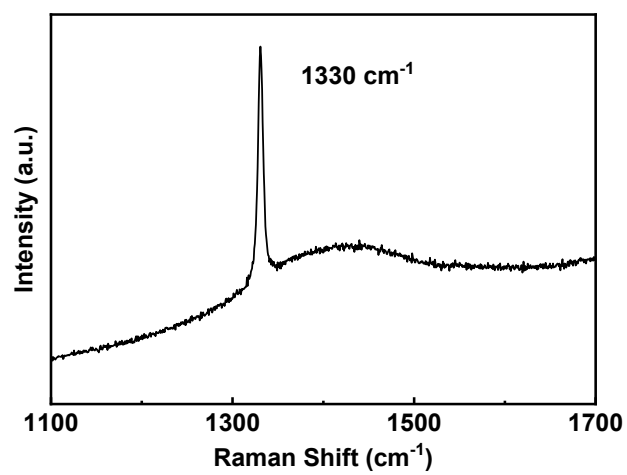

**Fig. S1** Raman spectrum of the CVD-grown polycrystalline diamond substrate.

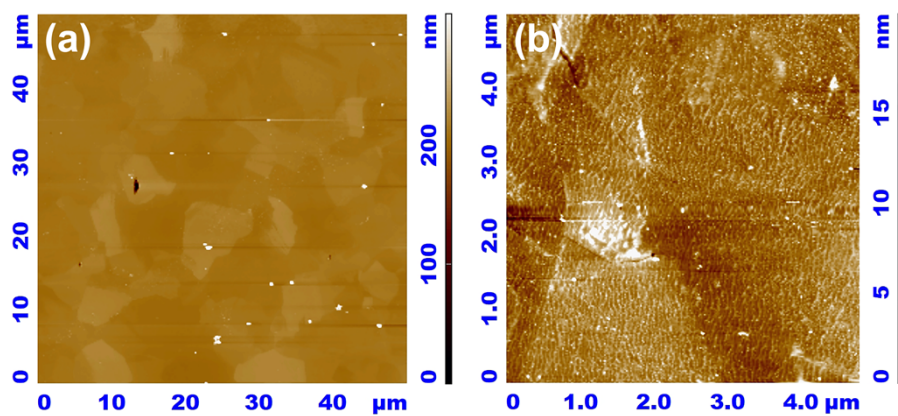

**Fig. S2** AFM images of diamond substrate with a scanning area of (a)  $50\ \mu\text{m} \times 50\ \mu\text{m}$  and (b)  $5\ \mu\text{m} \times 5\ \mu\text{m}$ . The RMS roughness is determined to be about 0.90 nm within a  $5\ \mu\text{m} \times 5\ \mu\text{m}$  region.

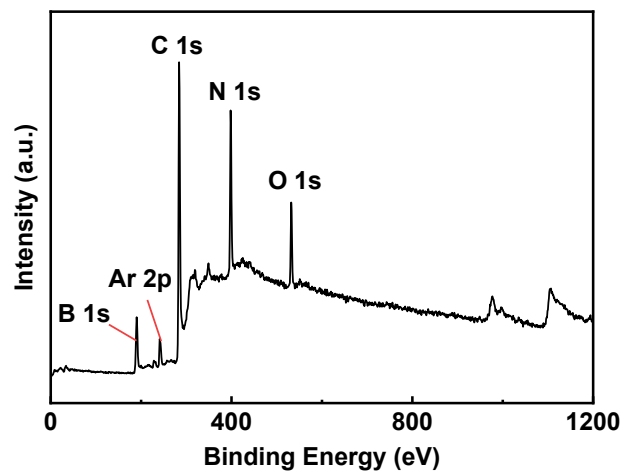

**Fig. S3** Full XPS spectrum of the h-BN layer grown on diamond. Besides the B and N constituents from the h-BN layer, Ar, C, and O signals can also be detected. The presence of Ar is attributed to the incorporation from the growth atmosphere, while C and O originates from the surface contaminants and adsorption as well as the diamond substrate.

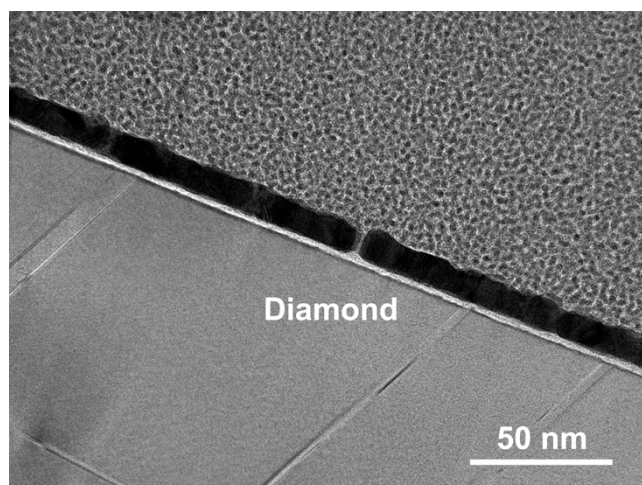

**Fig. S4** A typical low-magnification TEM image of h-BN/diamond heterojunction, showing a very uniform thickness of the h-BN layer (the brightest thin layer).

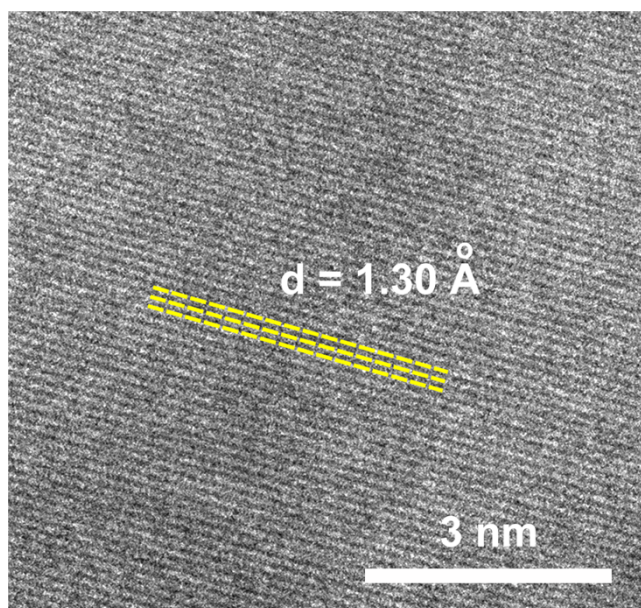

**Fig. S5** HRTEM image of diamond substrate, showing a lattice fringe of diamond (220) planes with a lattice spacing of  $1.30 \text{ \AA}$ .

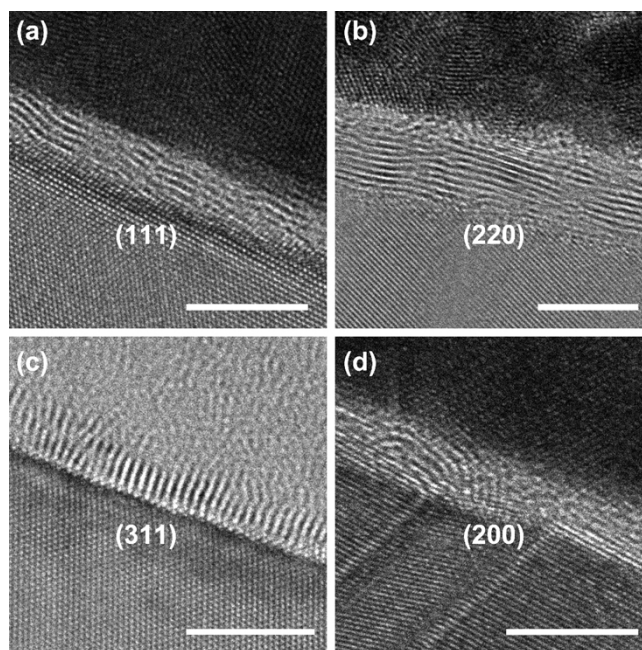

**Fig. S6** HRTEM images of h-BN/diamond heterointerface focused on different crystal facets of diamond substrate. The scale bars denote 5 nm in these images.

## Calculation of surface energy

We deduced the surface energy using the following equation:

$$E_{(hkl)}^S = \frac{\sigma}{2} \times N \times d_{(hkl)} \times \rho$$

where  $E_{(hkl)}^S$  is the surface energy of the sample terminated by specific facet,  $\sigma$  is the bond energy of specific atom,  $N$  is the quantity of dangling bonds for each atom at the specific crystal plane,  $d_{(hkl)}$  is the d-spacing of the crystal plane and the  $\rho$  is the volume density of atom of the sample.

The value of  $N$  can be determined from the structure models as shown in Figure S6. Such as for the (111) plane of diamond, half carbon atoms bond with the upper-layer atoms and the other part bond with the down-layer atoms. As a result, only half carbon atoms have one dangling bond represented as  $1 \times 1/2 + 0 \times 1/2$ .

The other computational details and the results are shown in Table S1.

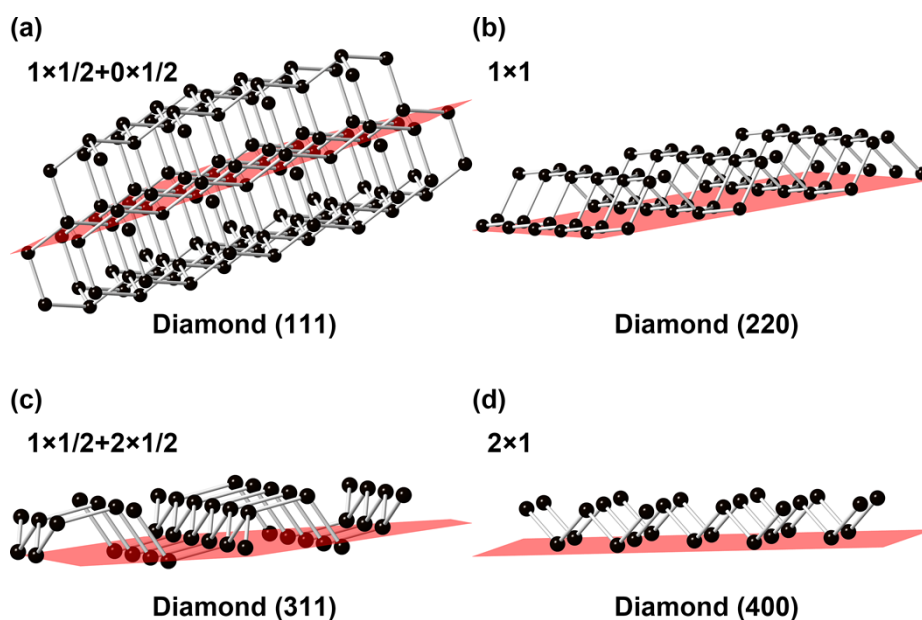

**Fig. S7** Structure models of diamond terminated by specific facet (red plane).



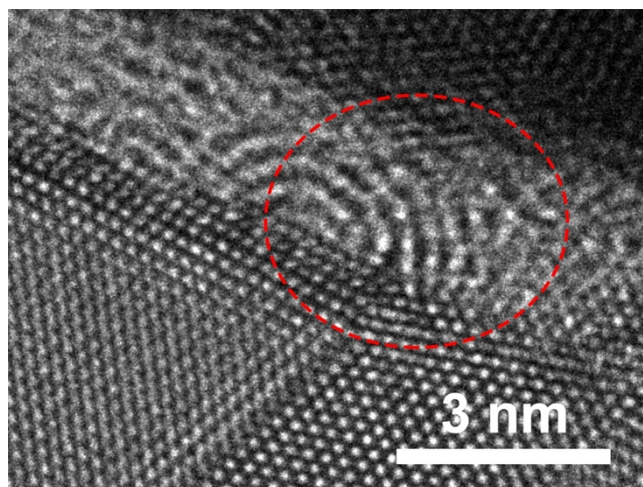

**Fig. S8** HRTEM images of h-BN/diamond heterostructure focused on the grain boundary region of diamond substrate.

**Table S1.** Computational details of the surface energy.

| Surface               | $\sigma$ [eV] | N                             | $d_{(hkl)}$ [ $\text{\AA}$ ] | $\rho$ [ $\text{\AA}^{-3}$ ] | $E_{(hkl)}^S$ [eV $\text{\AA}^{-2}$ ] |
|-----------------------|---------------|-------------------------------|------------------------------|------------------------------|---------------------------------------|
| Diamond (111)         | 3.78          | $1 \times 1/2 + 0 \times 1/2$ | 2.06                         | 0.18                         | 0.35                                  |
| Diamond (220)         | 3.78          | $1 \times 1$                  | 1.26                         | 0.18                         | 0.43                                  |
| Diamond (311)         | 3.78          | $2 \times 1/2 + 1 \times 1/2$ | 1.07                         | 0.18                         | 0.55                                  |
| Diamond (400)         | 3.78          | $2 \times 1$                  | 0.89                         | 0.18                         | 0.61                                  |
| h-BN ( $1\bar{1}00$ ) | 3.98          | $1 \times 1/2 + 0 \times 1/2$ | 2.16                         | 0.11                         | 0.24                                  |
